# Supplementary material for: Multimodal Graphene Oxide Nanoplatform Integrating Proteasome Inhibition and Phototherapy for Synergistic Oral Cancer Treatment
Source: Research Square preprint supplement (doi:10.21203/rs.3.rs-8213640/v1), 2025-12-25
Supplement: Supplementary file 1 [file 521ab6196c6b8a3f009c5b1f.pdf]

## **SUPPLEMENTARY INFORMATION**

### **Multimodal Graphene Oxide Nanoplatfrom Integrating Proteasome Inhibition and Phototherapy for Synergistic Oral Cancer Treatment**

Shishira P S<sup>1</sup>, Zinataman Sarkar<sup>1</sup>, Varshini Are<sup>1</sup>, Bhavesha Chanchlani<sup>1</sup>, Ankita Ghosh<sup>2</sup>, Swati  
Biswas<sup>1\*</sup>

<sup>1</sup>Nanomedicine Research Laboratory, Department of Pharmacy, Birla Institute of Technology &  
Science-Pilani, Hyderabad Campus, Jawahar Nagar, Medchal, Hyderabad-500078, Telangana, India.

<sup>2</sup>FIIT JEE Junior College, Saifabad, Hyderabad, Telangana-500004, India

\*Corresponding author

Swati Biswas, Ph.D.

Professor-Department of Pharmacy

Nanomedicine Research Laboratory

BITS-Pilani, Hyderabad campus

Medchal, Hyderabad-500078

Telangana, India

Email: swati.biswas@hyderabad.bits-pilani.ac.in

Phone: (+91)40-6630-3630

Fax: (+91)40-6630-3998

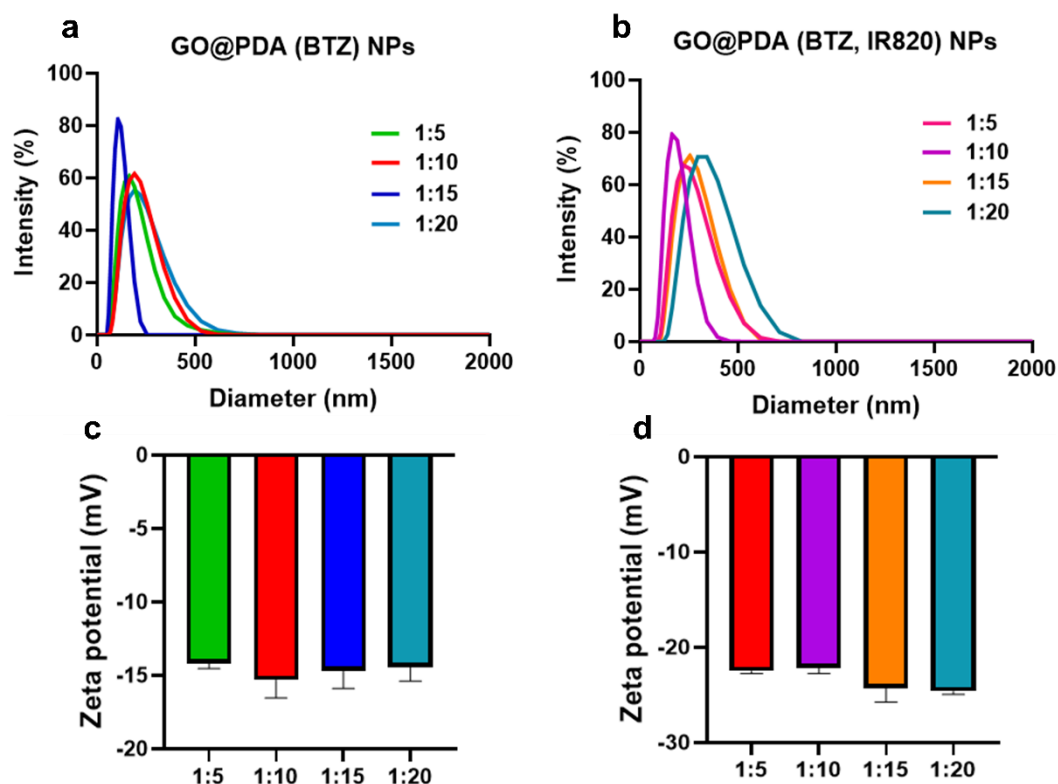

**Figure S1:** Particle size (a, b) and zeta potential (c, d) graphs of different ratios (1:5, 1:10, 1:15, and 1:20) of GO@PDA (BTZ) and GO@PDA (BTZ, IR820) NPs.

**Table S1:** Particle size, zeta potential, PDI, EE%, and DL% of GO@PDA (BTZ) NPs.

| BTZ: GO@PDA NPs | Particle size (nm) | Zeta Potential (mV) | PDI  | EE%   | DL%   |
|-----------------|--------------------|---------------------|------|-------|-------|
| 1: 5            | 161 ± 1.34         | -14.2± 0.53         | 0.13 | 71.3  | 11.88 |
| 1:10            | 174 ± 2.32         | -15.3± 0.74         | 0.32 | 80.12 | 7.30  |
| 1:15            | 114 ± 1.24         | -14.7± 0.91         | 0.12 | 89.2  | 5.45  |
| 1:20            | 194 ± 0.65         | -14.46± 1.23        | 0.15 | 80.5  | 3.83  |

**Table S2:** Particle size, zeta potential, PDI, EE%, and DL% of GO@PDA (BTZ, IR820) NPs.

| IR820:<br>GO@PDA<br>(BTZ)NPs | Particle size (nm) | Zeta Potential (mV) | PDI  | EE%  | DL%  |
|------------------------------|--------------------|---------------------|------|------|------|
| 1: 5                         | 216 ± 1.54         | -22.5± 0.92         | 0.24 | 65.4 | 10.9 |
| 1:10                         | 172 ± 1.43         | -22.2± 0.91         | 0.32 | 82.5 | 7.5  |
| 1:15                         | 232 ± 2.41         | -24.3± 1.11         | 0.26 | 79.3 | 4.95 |
| 1:20                         | 295 ± 1.45         | -24.6± 0.53         | 0.15 | 73.5 | 3.5  |

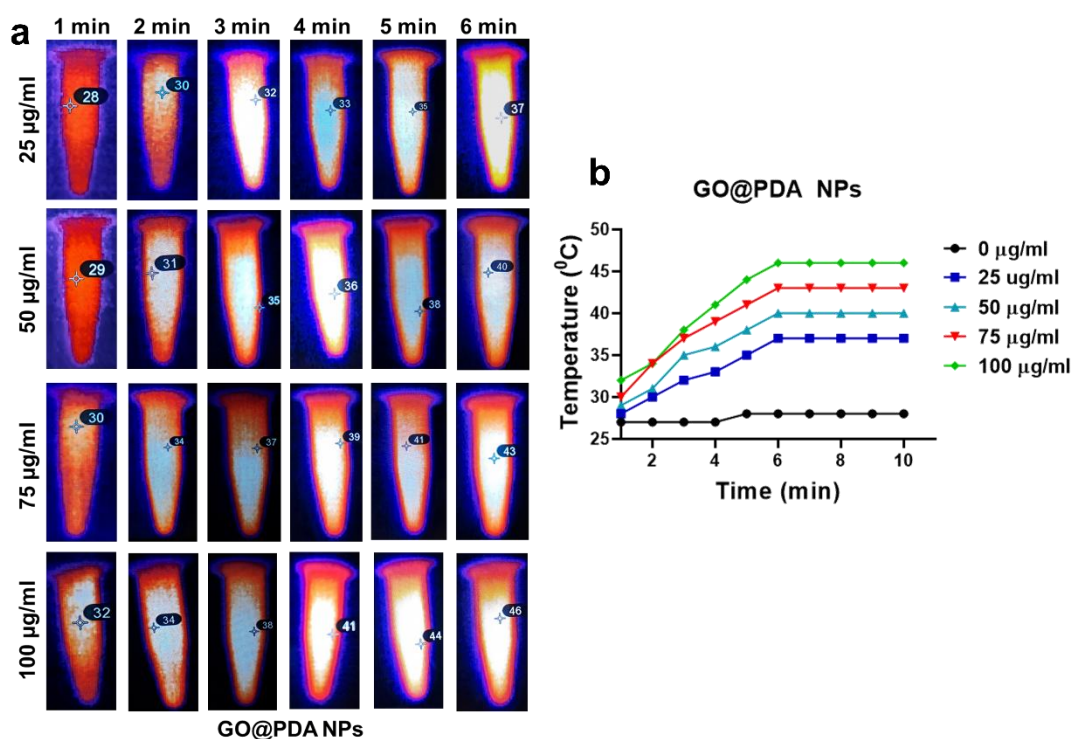

**Figure S2:** Photothermal effect images **a** of different concentrations of GO@PDA NPs irradiated with 808 nm NIR laser with 1 W/cm<sup>2</sup> laser density. Temperature variation graph **b** of GO@PDA NPs up to 10 mins.

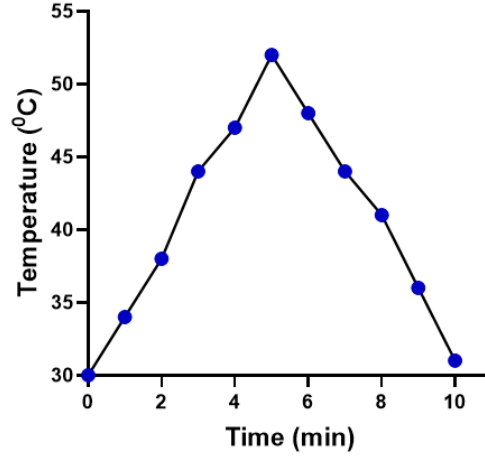

**Figure S3:** Cooling curve of GO@PDA (BTZ, IR820) NPs with 1.5 W/cm<sup>2</sup> at 808 nm laser.

#### Photothermal efficiency calculations:

To calculate the photothermal efficiency, the 100 µg/ml solution of GO@PDA (BTZ, IR820) NPs was irradiated with an 808 nm NIR laser / 1W/cm<sup>2</sup> laser density, and a cooling curve was plotted (**Figure S3**). The temperature of the surroundings was 28°C, the temperature of the blank was 30°C, and the temperature of the NPs increased from 30°C to 52°C, respectively, and remained constant. The absorbance of the solution ( $A_{808}$ ) = 0.9. The linear equation was obtained from the cooling curve:  $-0.0027x + 0.275$ , and further  $hS$  was calculated using the equation.

$$hS = -\text{Slope} \times \text{mass of the water (m)} \times \text{specific heat capacity of water (C)}$$

$$hS = -0.0027 \times (1.5 \text{ g}) \times 4.18 \text{ J/g } ^\circ\text{C}$$

$$hS = 0.169 \text{ W/}^\circ\text{C}$$

$$Q_{\text{dis}} = hS (T_{\text{M of blank}} - T_{\text{E}})$$

$$Q_{\text{dis}} = 0.169 \text{ W/}^\circ\text{C} (30^\circ\text{C} - 28^\circ\text{C})$$

$$Q_{\text{dis}} = 0.0338 \text{ W}$$

$$I = \text{Laser density used} \times \text{surface area of the tube used}$$

$$I = (1 \text{ W/cm}^2) \times \pi \times (0.5 \text{ cm})^2$$

$$I = 0.785 \text{ W}$$

$$\eta = \frac{hS (T_{\text{M}} - T_{\text{E}}) - Q_{\text{dis}}}{I (1 - 10^{-A_{808}})} \times 100$$

$$\eta = \frac{0.169 (52 - 28) - 0.0338}{0.785 (1 - 10^{-0.9})} \times 100$$

$$= 0.5418 \times 100$$

$$= \mathbf{54.18 \%}$$

**Raw data for Western Blot analysis:**

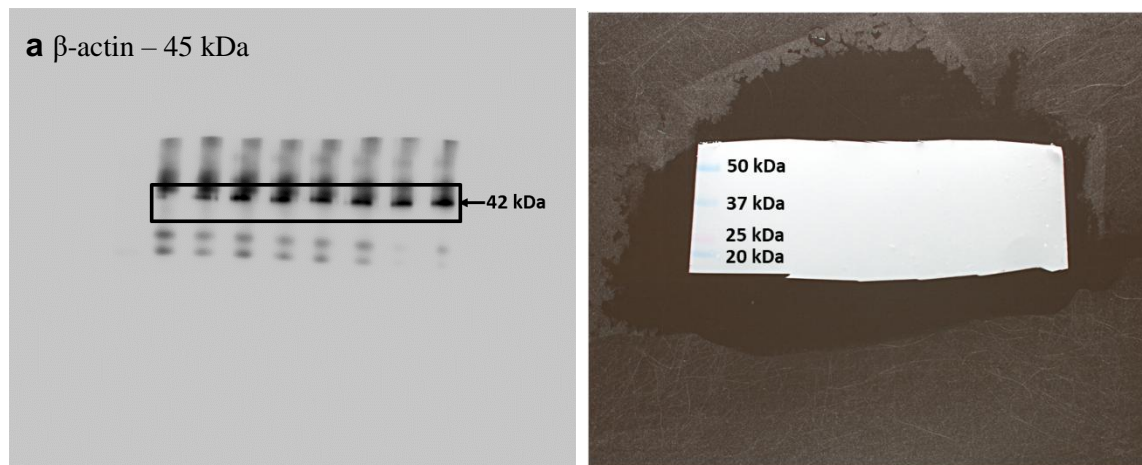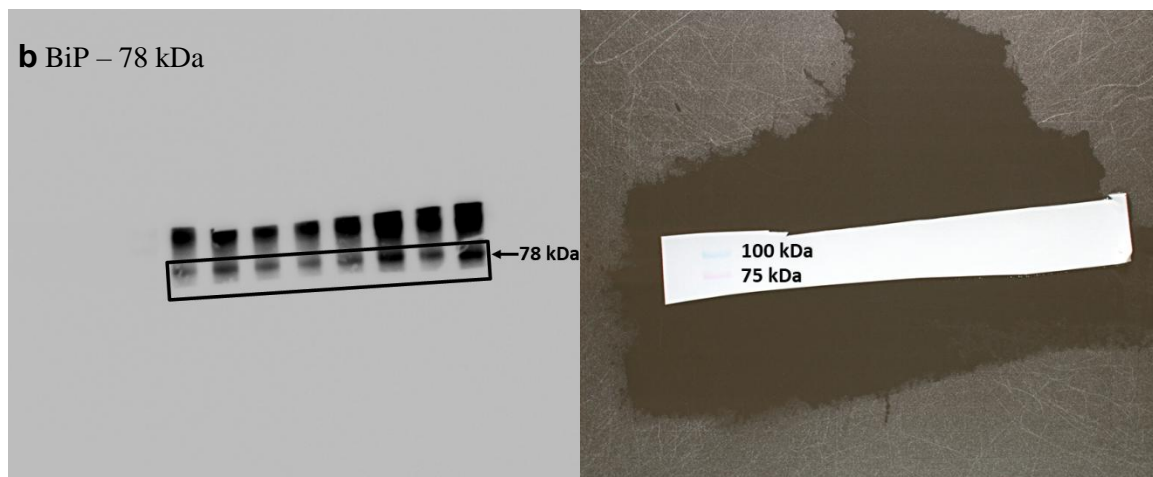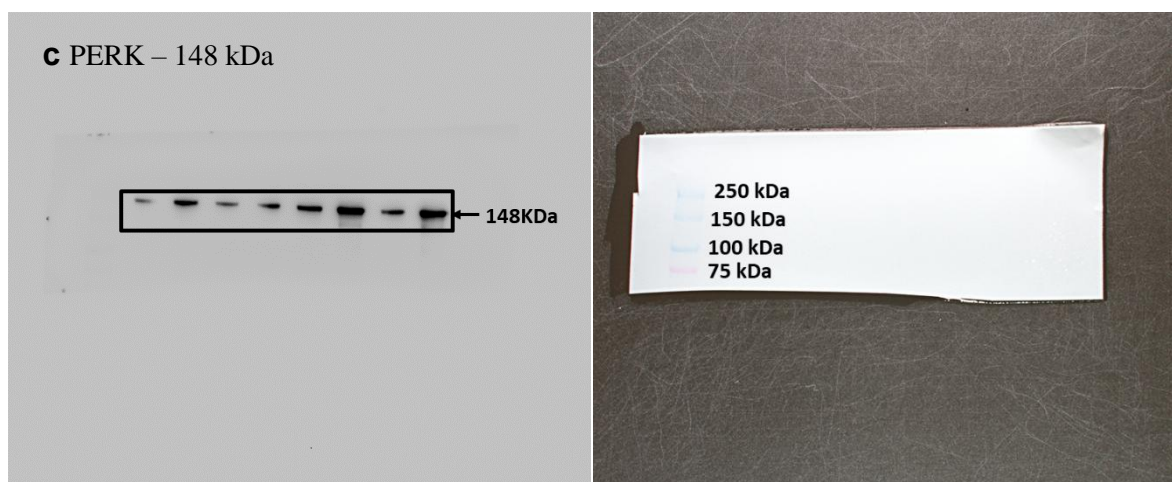

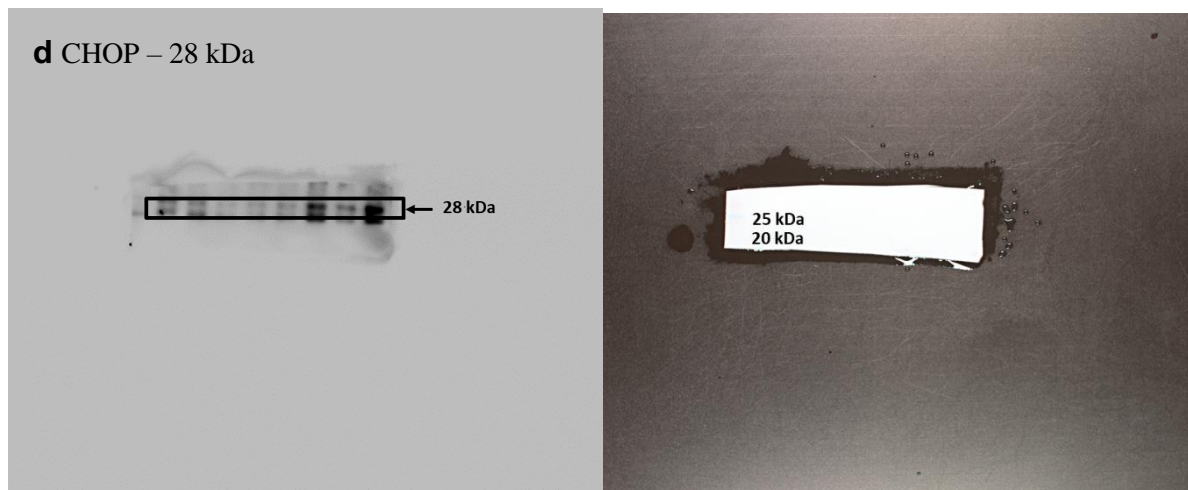

**Figure S4:** Western blot analysis. Full-length, uncropped Western blot of  $\beta$ -actin, BiP, CHOP, and PERK markers corresponding to **Figure 8b**. The boxed region in the raw figure was cropped from this blot and included in the main **Figure 8b**. The blot was developed under the same exposure conditions for all the markers.
